# Supplementary material for: Metabolic Evidence Rather Than Amounts of Red or Processed Meat as a Risk on Korean Colorectal Cancer
Source: MDPI journal article supplement (doi:10.3390/metabo11070462), 2021-07-16
Supplement: s1 [file s1]

Table S1. Characteristics of CRC cases

| ID      | location           | stage |
|---------|--------------------|-------|
| CMC1-01 | rectum             | 1     |
| CMC1-02 | rectum             | 2     |
| CMC1-03 | descending colon   | 3     |
| CMC1-04 | rectum             | 3     |
| CMC1-05 | sigmoid colon      | 2     |
| CMC1-06 | descending colon   | 3     |
| CMC1-07 | rectosigmoid colon | 2     |
| CMC1-08 | ascending colon    | 1     |
| CMC1-09 | descending colon   | 3     |
| CMC1-10 | rectum             | 1     |
| CMC1-11 | rectosigmoid colon | 4     |
| CMC1-12 | ascending colon    | 3     |
| CMC1-13 | sigmoid colon      | 1     |
| CMC1-15 | rectosigmoid colon | 3     |
| CMC1-16 | rectum             | 3     |

Table S2. Significant associations among CRC, diet and biomarkers

| Variable                  | by Variable                           | $\rho$ | <i>P</i> -value |
|---------------------------|---------------------------------------|--------|-----------------|
| 1-OHP (ug/L)              | C22:1/cre (ug/L)                      | -0.37  | 0.04            |
| 1-OHP (ug/L)              | C22:4/cre (ug/g cre)                  | -0.35  | 0.06            |
| 1-OHP (ug/L)              | C22:6/cre (ug/g cre)                  | -0.40  | 0.03            |
| 1-OHP (ug/L)              | C24:1/cre (ug/g cre)                  | -0.37  | 0.05            |
| 1-OHP with Cre (ug/g Cre) | C14:0/cre (ug/g cre)                  | 0.57   | 0.00            |
| 1-OHP with Cre (ug/g Cre) | C14:1/cre (ug/g cre)                  | 0.38   | 0.04            |
| 1-OHP with Cre (ug/g Cre) | C15:0/cre (ug/g cre)                  | 0.60   | 0.00            |
| 1-OHP with Cre (ug/g Cre) | C15:1 (ug/L)                          | -0.50  | 0.01            |
| 1-OHP with Cre (ug/g Cre) | C16:0/cre (ug/g cre)                  | 0.60   | 0.00            |
| 1-OHP with Cre (ug/g Cre) | C16:1/cre (ug/g cre)                  | 0.36   | 0.05            |
| 1-OHP with Cre (ug/g Cre) | C16:1T/cre (ug/g cre)                 | 0.36   | 0.05            |
| 1-OHP with Cre (ug/g Cre) | C17:0/cre (ug/g cre)                  | 0.33   | 0.07            |
| 1-OHP with Cre (ug/g Cre) | C18:0/cre (ug/g cre)                  | 0.56   | 0.00            |
| 1-OHP with Cre (ug/g Cre) | C18:1 Mix/cre (ug/g cre)              | 0.37   | 0.05            |
| 1-OHP with Cre (ug/g Cre) | C18:2 Mix/cre (ug/g cre)              | 0.39   | 0.03            |
| 1-OHP with Cre (ug/g Cre) | C18:3 Alpha Linolenate/cre (ug/g cre) | 0.37   | 0.04            |
| 1-OHP with Cre (ug/g Cre) | C18:3 Gamma Linolenate/cre (ug/g cre) | 0.44   | 0.02            |
| 1-OHP with Cre (ug/g Cre) | C19:1/cre (ug/g cre)                  | 0.63   | 0.00            |
| 1-OHP with Cre (ug/g Cre) | C20:1 Mix/cre (ug/g cre)              | 0.42   | 0.02            |
| 1-OHP with Cre (ug/g Cre) | C20:2/cre (ug/g cre)                  | 0.54   | 0.00            |
| 1-OHP with Cre (ug/g Cre) | C20:4 (ug/L)                          | -0.63  | 0.00            |
| 1-OHP with Cre (ug/g Cre) | C20:4/cre (ug/g cre)                  | 0.49   | 0.01            |
| 1-OHP with Cre (ug/g Cre) | C22:0/cre (ug/g cre)                  | 0.57   | 0.00            |
| 1-OHP with Cre (ug/g Cre) | C22:1 (ug/L)                          | 0.40   | 0.03            |
| 1-OHP with Cre (ug/g Cre) | C22:1/cre (ug/g cre)                  | 0.74   | 0.00            |
| 1-OHP with Cre (ug/g Cre) | C22:2/cre (ug/g cre)                  | 0.55   | 0.00            |
| 1-OHP with Cre (ug/g Cre) | C22:3/cre (ug/g cre)                  | 0.49   | 0.01            |
| 1-OHP with Cre (ug/g Cre) | C22:4 (ug/L)                          | -0.46  | 0.01            |
| 1-OHP with Cre (ug/g Cre) | C22:4/cre (ug/g cre)                  | 0.54   | 0.00            |
| 1-OHP with Cre (ug/g Cre) | C22:5 (ug/L)                          | -0.51  | 0.00            |
| 1-OHP with Cre (ug/g Cre) | C22:5/cre (ug/g cre)                  | 0.49   | 0.01            |
| 1-OHP with Cre (ug/g Cre) | C22:6 (ug/L)                          | -0.63  | 0.00            |
| 1-OHP with Cre (ug/g Cre) | C22:6/cre (ug/g cre)                  | 0.58   | 0.00            |
| 1-OHP with Cre (ug/g Cre) | C24:0/cre (ug/g cre)                  | 0.43   | 0.02            |
| 1-OHP with Cre (ug/g Cre) | C24:1 (ug/L)                          | -0.46  | 0.01            |
| 1-OHP with Cre (ug/g Cre) | C24:1/cre (ug/g cre)                  | 0.57   | 0.00            |
| 1-OHP with Cre (ug/g Cre) | CCL2                                  | -0.62  | 0.08            |

|                           |                               |       |      |
|---------------------------|-------------------------------|-------|------|
| 1-OHP with Cre (ug/g Cre) | MeIQx with Cre (ng/g cre)     | 0.61  | 0.00 |
| 1-OHP with Cre (ug/g Cre) | MUFA/cre (ug/g cre)           | 0.38  | 0.04 |
| 1-OHP with Cre (ug/g Cre) | PhIP with Cre (ng/g cre)      | 0.52  | 0.00 |
| 1-OHP with Cre (ug/g Cre) | PUFA/cre (ug/g cre)           | 0.45  | 0.01 |
| 1-OHP with Cre (ug/g Cre) | SAFA/cre                      | 0.60  | 0.00 |
| 1-OHP with Cre (ug/g Cre) | total fatty acid/cre          | 0.57  | 0.00 |
| 1-OHP with Cre (ug/g Cre) | TP53                          | -0.39 | 0.07 |
| 1-OHP with Cre (ug/g Cre) | UFA/cre (ug/g cre)            | 0.40  | 0.03 |
| 5-mC (ng=%)               | C15:1/cre (ug/g cre)          | -0.40 | 0.03 |
| 5-mC (ng=%)               | C18:3 Alpha Linolenate (ug/L) | -0.37 | 0.04 |
| 5-mC (ng=%)               | C24:0 (ug/L)                  | 0.33  | 0.08 |
| Age (years)               | BW (kg)                       | -0.46 | 0.01 |
| Age (years)               | Height (cm)                   | -0.45 | 0.01 |
| Age (years)               | MeIQx (ng/L)                  | -0.34 | 0.06 |
| Age (years)               | MLH1                          | 0.47  | 0.02 |
| Age (years)               | Processed meat (g)            | -0.39 | 0.04 |
| Age (years)               | XPC                           | 0.37  | 0.09 |
| Age (years)               | Total lipid (g)               | -0.35 | 0.06 |
| ALT (U)                   | C20:5 (ug/L)                  | -0.32 | 0.08 |
| ALT (U)                   | C22:2 (ug/L)                  | -0.34 | 0.06 |
| ALT (U)                   | CRP (mg/dL)                   | 0.41  | 0.03 |
| ALT (U)                   | Fiber (g)                     | 0.39  | 0.04 |
| ALT (U)                   | Folate (μg)                   | 0.36  | 0.05 |
| ALT (U)                   | LDLC (mg/dL)                  | -0.44 | 0.01 |
| APC                       | KRAS                          | 0.91  | 0.00 |
| APC                       | MGMT                          | -0.51 | 0.01 |
| APC                       | SULT1A1                       | 0.83  | 0.00 |
| AST (U)                   | ALT (U)                       | 0.69  | 0.00 |
| AST (U)                   | C22:4/cre (ug/g cre)          | 0.40  | 0.03 |
| AST (U)                   | C22:6/cre (ug/g cre)          | 0.31  | 0.09 |
| AST (U)                   | C24:1/cre (ug/g cre)          | 0.34  | 0.06 |
| AST (U)                   | CCL2                          | -0.62 | 0.08 |
| AST (U)                   | Fiber (g)                     | 0.33  | 0.08 |
| AST (U)                   | LDLC (mg/dL)                  | -0.37 | 0.05 |
| AST (U)                   | MDA (umol/L)                  | -0.37 | 0.05 |
| AST (U)                   | UGT1A9                        | 0.61  | 0.02 |
| BMI (kg/m^2)              | 1-OHP (ug/L)                  | -0.32 | 0.08 |
| BMI (kg/m^2)              | CRP (mg/dL)                   | 0.36  | 0.05 |
| BMI (kg/m^2)              | dG-C8 MeIQx/1.766ug of DNA    | -0.32 | 0.09 |
| BMI (kg/m^2)              | MLH1                          | 0.49  | 0.02 |
| BMI (kg/m^2)              | Processed meat (g)            | 0.39  | 0.04 |

|                            |                                       |       |      |
|----------------------------|---------------------------------------|-------|------|
| BW (kg)                    | 1-OHP (ug/L)                          | -0.42 | 0.02 |
| BW (kg)                    | BMI (kg/m^2)                          | 0.77  | 0.00 |
| BW (kg)                    | C18:2 Mix/cre (ug/g cre)              | -0.35 | 0.06 |
| BW (kg)                    | C18:3 Gamma Linolenate/cre (ug/g cre) | -0.39 | 0.03 |
| BW (kg)                    | PPARG                                 | 0.45  | 0.05 |
| BW (kg)                    | Processed meat (g)                    | 0.41  | 0.03 |
| BW (kg)                    | PUFA/cre (ug/g cre)                   | -0.37 | 0.04 |
| BW (kg)                    | SULT1A1                               | -0.36 | 0.09 |
| CCL2                       | C22:5 (ug/L)                          | 0.73  | 0.03 |
| CCL2                       | NAT2                                  | 1.00  | 0.00 |
| CCL2                       | TP53                                  | 0.92  | 0.00 |
| CCL2                       | UGT1A9                                | 0.94  | 0.00 |
| CCL2                       | XPC                                   | -0.84 | 0.01 |
| CRP (mg/dL)                | C20:4 (ug/L)                          | -0.34 | 0.06 |
| CRP (mg/dL)                | C22:2/cre (ug/g cre)                  | 0.32  | 0.08 |
| CRP (mg/dL)                | C22:3/cre (ug/g cre)                  | 0.35  | 0.05 |
| dG-C8 MeIQx/1.766ug of DNA | 1-OHP (ug/L)                          | 0.31  | 0.09 |
| dG-C8 MeIQx/1.766ug of DNA | C18:2 Mix (ug/L)                      | 0.34  | 0.07 |
| dG-C8 MeIQx/1.766ug of DNA | C18:3 Gamma Linolenate (ug/L)         | 0.35  | 0.06 |
| dG-C8 MeIQx/1.766ug of DNA | C19:1 (ug/L)                          | 0.35  | 0.06 |
| dG-C8 MeIQx/1.766ug of DNA | C20:1 Mix (ug/L)                      | 0.32  | 0.08 |
| dG-C8 MeIQx/1.766ug of DNA | C20:2 (ug/L)                          | 0.33  | 0.08 |
| dG-C8 MeIQx/1.766ug of DNA | C20:3 Eicosatrienoate (ug/L)          | 0.31  | 0.09 |
| dG-C8 MeIQx/1.766ug of DNA | C20:3 Homogamma Linolenate (ug/L)     | 0.52  | 0.00 |
| dG-C8 MeIQx/1.766ug of DNA | C20:5 (ug/L)                          | 0.53  | 0.00 |
| dG-C8 MeIQx/1.766ug of DNA | C20:5/cre (ug/g cre)                  | 0.32  | 0.09 |
| dG-C8 MeIQx/1.766ug of DNA | C22:6/cre (ug/g cre)                  | -0.34 | 0.07 |
| dG-C8 MeIQx/1.766ug of DNA | C24:0 (ug/L)                          | 0.32  | 0.09 |
| dG-C8 MeIQx/1.766ug of DNA | MDA with Cre (uM/g cre)               | -0.46 | 0.01 |
| dG-C8 MeIQx/1.766ug of DNA | MeIQx with Cre (ng/g cre)             | -0.43 | 0.02 |
| dG-C8 MeIQx/1.766ug of DNA | PhIP with Cre (ng/g cre)              | -0.39 | 0.03 |
| dG-C8 MeIQx/1.766ug of DNA | PUFA                                  | 0.41  | 0.02 |
| dG-C8 MeIQx/1.766ug of DNA | XPC                                   | -0.47 | 0.03 |
| Fiber (g)                  | C15:1 (ug/L)                          | 0.64  | 0.00 |
| Fiber (g)                  | C15:1/cre (ug/g cre)                  | 0.52  | 0.00 |
| Fiber (g)                  | Folate (μg)                           | 0.97  | 0.00 |
| Fiber (g)                  | Fruit (g)                             | 0.57  | 0.00 |
| Fiber (g)                  | Kimchi (g)                            | 0.78  | 0.00 |
| Fiber (g)                  | UGT1A9                                | 0.70  | 0.01 |
| Fiber (g)                  | Vegetable lipid (g)                   | 0.65  | 0.00 |

|              |                                       |       |      |
|--------------|---------------------------------------|-------|------|
| Fiber (g)    | Total lipid (g)                       | 0.44  | 0.02 |
| Folate (μg)  | C15:1 (ug/L)                          | 0.59  | 0.00 |
| Folate (μg)  | C15:1/cre (ug/g cre)                  | 0.50  | 0.01 |
| Folate (μg)  | Fruit (g)                             | 0.61  | 0.00 |
| Folate (μg)  | Kimchi (g)                            | 0.76  | 0.00 |
| Folate (μg)  | PhIP (ng/L)                           | -0.32 | 0.09 |
| Folate (μg)  | PPARG                                 | -0.44 | 0.06 |
| Folate (μg)  | UGT1A9                                | 0.60  | 0.02 |
| Folate (μg)  | Vegetable lipid (g)                   | 0.61  | 0.00 |
| Folate (μg)  | Total lipid (g)                       | 0.43  | 0.02 |
| Fruit (g)    | C15:1 (ug/L)                          | 0.37  | 0.05 |
| Fruit (g)    | C22:5 (ug/L)                          | 0.46  | 0.01 |
| Fruit (g)    | CCL2                                  | 0.82  | 0.01 |
| Fruit (g)    | Kimchi (g)                            | 0.39  | 0.04 |
| Fruit (g)    | MDA (umol/L)                          | 0.38  | 0.04 |
| Fruit (g)    | NAT2                                  | 0.79  | 0.00 |
| Fruit (g)    | TP53                                  | 0.40  | 0.07 |
| Fruit (g)    | UGT1A9                                | 0.49  | 0.08 |
| HDLC (mg/dL) | C14:1/cre (ug/g cre)                  | 0.35  | 0.06 |
| HDLC (mg/dL) | C18:2 Mix/cre (ug/g cre)              | 0.34  | 0.06 |
| HDLC (mg/dL) | C18:3 Alpha Linolenate/cre (ug/g cre) | 0.34  | 0.06 |
| HDLC (mg/dL) | C18:3 Gamma Linolenate/cre (ug/g cre) | 0.45  | 0.01 |
| HDLC (mg/dL) | C20:5/cre (ug/g cre)                  | 0.34  | 0.06 |
| HDLC (mg/dL) | C22:2/cre (ug/g cre)                  | 0.37  | 0.04 |
| HDLC (mg/dL) | C22:4 (ug/L)                          | -0.36 | 0.05 |
| HDLC (mg/dL) | C24:1 (ug/L)                          | -0.39 | 0.03 |
| HDLC (mg/dL) | C24:1/cre (ug/g cre)                  | -0.40 | 0.03 |
| HDLC (mg/dL) | PPARG                                 | -0.46 | 0.04 |
| HDLC (mg/dL) | PUFA/cre (ug/g cre)                   | 0.37  | 0.04 |
| HDLC (mg/dL) | UFA/cre (ug/g cre)                    | 0.32  | 0.09 |
| Height (cm)  | AST (U)                               | -0.32 | 0.09 |
| Height (cm)  | BW (kg)                               | 0.64  | 0.00 |
| Height (cm)  | C15:1/cre (ug/g cre)                  | -0.36 | 0.05 |
| Height (cm)  | C18:3 Gamma Linolenate/cre (ug/g cre) | -0.34 | 0.06 |
| Height (cm)  | C20:5/cre (ug/g cre)                  | -0.33 | 0.07 |
| Height (cm)  | Fiber (g)                             | -0.32 | 0.09 |
| Height (cm)  | Folate (μg)                           | -0.35 | 0.06 |
| Height (cm)  | HDLC (mg/dL)                          | -0.38 | 0.04 |

|                  |                                      |       |      |
|------------------|--------------------------------------|-------|------|
| Height (cm)      | MeIQx (ng/L)                         | 0.31  | 0.09 |
| Height (cm)      | PPARG                                | 0.41  | 0.08 |
| Height (cm)      | PUFA/cre (ug/g cre)                  | -0.32 | 0.09 |
| Height (cm)      | TG (mg/dL)                           | 0.31  | 0.09 |
| Height (cm)      | UGT1A9                               | -0.52 | 0.06 |
| Homocystein (uM) | C14:1/cre (ug/g cre)                 | 0.34  | 0.07 |
| Homocystein (uM) | C15:0 (ug/L)                         | 0.37  | 0.04 |
| Homocystein (uM) | C15:0/cre (ug/g cre)                 | 0.33  | 0.07 |
| Homocystein (uM) | C16:0 (ug/L)                         | 0.41  | 0.03 |
| Homocystein (uM) | C16:0/cre (ug/g cre)                 | 0.33  | 0.07 |
| Homocystein (uM) | C19:1/cre (ug/g cre)                 | 0.31  | 0.09 |
| Homocystein (uM) | C20:1 Mix (ug/L)                     | 0.50  | 0.00 |
| Homocystein (uM) | C20:1 Mix/cre (ug/g cre)             | 0.48  | 0.01 |
| Homocystein (uM) | C20:2 (ug/L)                         | 0.43  | 0.02 |
| Homocystein (uM) | C20:2/cre (ug/g cre)                 | 0.40  | 0.03 |
| Homocystein (uM) | C20:3 Eicosatrienoate (ug/L)         | 0.61  | 0.00 |
| Homocystein (uM) | C20:3 Eicosatrienoate/cre (ug/g cre) | 0.60  | 0.00 |
| Homocystein (uM) | C20:4 (ug/L)                         | -0.35 | 0.06 |
| Homocystein (uM) | C20:4/cre (ug/g cre)                 | -0.35 | 0.06 |
| Homocystein (uM) | C22:1 (ug/L)                         | 0.56  | 0.00 |
| Homocystein (uM) | C22:1/cre (ug/g cre)                 | 0.37  | 0.04 |
| Homocystein (uM) | C24:0/cre (ug/g cre)                 | 0.32  | 0.08 |
| Homocystein (uM) | SAFA                                 | 0.33  | 0.08 |
| Homocystein (uM) | Yogurt (g)                           | 0.57  | 0.00 |
| Kimchi (g)       | C15:1 (ug/L)                         | 0.63  | 0.00 |
| Kimchi (g)       | C15:1/cre (ug/g cre)                 | 0.37  | 0.05 |
| Kimchi (g)       | UGT1A9                               | 0.69  | 0.01 |
| Kimchi (g)       | Vegetable lipid (g)                  | 0.42  | 0.02 |
| KRAS             | C22:0/cre (ug/g cre)                 | -0.39 | 0.06 |
| KRAS             | C24:0/cre (ug/g cre)                 | -0.37 | 0.08 |
| KRAS             | MGMT                                 | -0.55 | 0.01 |
| KRAS             | PPARG                                | 0.43  | 0.06 |
| KRAS             | SULT1A1                              | 0.78  | 0.00 |
| KRAS             | TP53                                 | 0.43  | 0.05 |
| LDLC (mg/dL)     | C14:0 (ug/L)                         | 0.43  | 0.02 |
| LDLC (mg/dL)     | C14:0/cre (ug/g cre)                 | 0.34  | 0.06 |
| LDLC (mg/dL)     | C15:0 (ug/L)                         | 0.40  | 0.03 |
| LDLC (mg/dL)     | C16:0 (ug/L)                         | 0.47  | 0.01 |
| LDLC (mg/dL)     | C16:0/cre (ug/g cre)                 | 0.34  | 0.06 |
| LDLC (mg/dL)     | C16:1 (ug/L)                         | 0.39  | 0.03 |

|              |                                           |       |      |
|--------------|-------------------------------------------|-------|------|
| LDLC (mg/dL) | C16:1/cre (ug/g cre)                      | 0.37  | 0.05 |
| LDLC (mg/dL) | C16:1T (ug/L)                             | 0.39  | 0.03 |
| LDLC (mg/dL) | C16:1T/cre (ug/g cre)                     | 0.37  | 0.05 |
| LDLC (mg/dL) | C17:0 (ug/L)                              | 0.38  | 0.04 |
| LDLC (mg/dL) | C17:0/cre (ug/g cre)                      | 0.38  | 0.04 |
| LDLC (mg/dL) | C18:0 (ug/L)                              | 0.46  | 0.01 |
| LDLC (mg/dL) | C18:0/cre (ug/g cre)                      | 0.34  | 0.07 |
| LDLC (mg/dL) | C18:1 Mix (ug/L)                          | 0.44  | 0.01 |
| LDLC (mg/dL) | C18:1 Mix/cre (ug/g cre)                  | 0.38  | 0.04 |
| LDLC (mg/dL) | C18:2 Mix (ug/L)                          | 0.34  | 0.06 |
| LDLC (mg/dL) | C18:3 Gamma Linolenate (ug/L)             | 0.37  | 0.04 |
| LDLC (mg/dL) | C19:0 (ug/L)                              | 0.37  | 0.04 |
| LDLC (mg/dL) | C19:0/cre (ug/g cre)                      | 0.35  | 0.06 |
| LDLC (mg/dL) | C19:1 (ug/L)                              | 0.51  | 0.00 |
| LDLC (mg/dL) | C19:1/cre (ug/g cre)                      | 0.37  | 0.05 |
| LDLC (mg/dL) | C20:0 (ug/L)                              | 0.39  | 0.04 |
| LDLC (mg/dL) | C20:0/cre (ug/g cre)                      | 0.33  | 0.08 |
| LDLC (mg/dL) | C20:1 Mix (ug/L)                          | 0.34  | 0.07 |
| LDLC (mg/dL) | C20:3 Homogamma Linolenate (ug/L)         | 0.44  | 0.01 |
| LDLC (mg/dL) | C20:3 Homogamma Linolenate/cre (ug/g cre) | 0.38  | 0.04 |
| LDLC (mg/dL) | C20:5 (ug/L)                              | 0.44  | 0.01 |
| LDLC (mg/dL) | C20:5/cre (ug/g cre)                      | 0.38  | 0.04 |
| LDLC (mg/dL) | C22:2 (ug/L)                              | 0.35  | 0.06 |
| LDLC (mg/dL) | dG-C8 MeIQx/1.766ug of DNA                | 0.44  | 0.02 |
| LDLC (mg/dL) | Fruit (g)                                 | -0.34 | 0.07 |
| LDLC (mg/dL) | MUFA                                      | 0.44  | 0.02 |
| LDLC (mg/dL) | MUFA/cre (ug/g cre)                       | 0.38  | 0.04 |
| LDLC (mg/dL) | NAT2                                      | -0.55 | 0.03 |
| LDLC (mg/dL) | PUFA                                      | 0.35  | 0.06 |
| LDLC (mg/dL) | SAFA                                      | 0.47  | 0.01 |
| LDLC (mg/dL) | SAFA/cre                                  | 0.35  | 0.06 |
| LDLC (mg/dL) | total fatty acid                          | 0.48  | 0.01 |
| LDLC (mg/dL) | total fatty acid/cre                      | 0.37  | 0.05 |
| LDLC (mg/dL) | UFA (ug/L)                                | 0.43  | 0.02 |
| LDLC (mg/dL) | UFA/cre (ug/g cre)                        | 0.36  | 0.05 |
| MDA (umol/L) | 1-OHP with Cre (ug/g Cre)                 | -0.40 | 0.03 |
| MDA (umol/L) | C14:0/cre (ug/g cre)                      | -0.33 | 0.08 |
| MDA (umol/L) | C14:1/cre (ug/g cre)                      | -0.35 | 0.05 |
| MDA (umol/L) | C15:0/cre (ug/g cre)                      | -0.31 | 0.09 |
| MDA (umol/L) | C15:1/cre (ug/g cre)                      | -0.32 | 0.08 |

|                         |                                           |       |      |
|-------------------------|-------------------------------------------|-------|------|
| MDA (umol/L)            | C16:0/cre (ug/g cre)                      | -0.35 | 0.06 |
| MDA (umol/L)            | C16:1/cre (ug/g cre)                      | -0.31 | 0.09 |
| MDA (umol/L)            | C16:1T/cre (ug/g cre)                     | -0.31 | 0.09 |
| MDA (umol/L)            | C18:2 Mix/cre (ug/g cre)                  | -0.33 | 0.07 |
| MDA (umol/L)            | C18:3 Gamma Linolenate/cre (ug/g cre)     | -0.31 | 0.09 |
| MDA (umol/L)            | C19:1/cre (ug/g cre)                      | -0.32 | 0.09 |
| MDA (umol/L)            | C20:1 Mix (ug/L)                          | -0.31 | 0.10 |
| MDA (umol/L)            | C20:1 Mix/cre (ug/g cre)                  | -0.35 | 0.06 |
| MDA (umol/L)            | C20:2/cre (ug/g cre)                      | -0.38 | 0.04 |
| MDA (umol/L)            | C20:3 Homogamma Linolenate/cre (ug/g cre) | -0.35 | 0.06 |
| MDA (umol/L)            | C20:5/cre (ug/g cre)                      | -0.34 | 0.07 |
| MDA (umol/L)            | C22:1 (ug/L)                              | -0.37 | 0.04 |
| MDA (umol/L)            | C22:1/cre (ug/g cre)                      | -0.39 | 0.03 |
| MDA (umol/L)            | C22:3 (ug/L)                              | -0.31 | 0.10 |
| MDA (umol/L)            | C22:3/cre (ug/g cre)                      | -0.36 | 0.05 |
| MDA (umol/L)            | C22:5 (ug/L)                              | 0.39  | 0.03 |
| MDA (umol/L)            | C24:1/cre (ug/g cre)                      | -0.33 | 0.07 |
| MDA (umol/L)            | CCL2                                      | 0.94  | 0.00 |
| MDA (umol/L)            | MDA with Cre (uM/g cre)                   | 0.33  | 0.07 |
| MDA (umol/L)            | MUFA/cre (ug/g cre)                       | -0.31 | 0.09 |
| MDA (umol/L)            | NAT2                                      | 0.62  | 0.01 |
| MDA (umol/L)            | PUFA/cre (ug/g cre)                       | -0.35 | 0.05 |
| MDA (umol/L)            | SAFA/cre                                  | -0.32 | 0.08 |
| MDA (umol/L)            | total fatty acid/cre                      | -0.34 | 0.07 |
| MDA (umol/L)            | UFA/cre (ug/g cre)                        | -0.33 | 0.08 |
| MDA with Cre (uM/g cre) | 1-OHP (ug/L)                              | -0.40 | 0.03 |
| MDA with Cre (uM/g cre) | 1-OHP with Cre (ug/g Cre)                 | 0.47  | 0.01 |
| MDA with Cre (uM/g cre) | C14:1 (ug/L)                              | -0.41 | 0.02 |
| MDA with Cre (uM/g cre) | C15:1 (ug/L)                              | -0.40 | 0.03 |
| MDA with Cre (uM/g cre) | C18:1 Mix (ug/L)                          | -0.31 | 0.10 |
| MDA with Cre (uM/g cre) | C18:2 Mix (ug/L)                          | -0.36 | 0.05 |
| MDA with Cre (uM/g cre) | C18:3 Alpha Linolenate/cre (ug/g cre)     | 0.63  | 0.00 |
| MDA with Cre (uM/g cre) | C18:3 Gamma Linolenate (ug/L)             | -0.31 | 0.10 |
| MDA with Cre (uM/g cre) | C19:1 (ug/L)                              | -0.37 | 0.04 |
| MDA with Cre (uM/g cre) | C20:3 Homogamma Linolenate (ug/L)         | -0.34 | 0.07 |
| MDA with Cre (uM/g cre) | C20:4 (ug/L)                              | -0.43 | 0.02 |
| MDA with Cre (uM/g cre) | C20:4/cre (ug/g cre)                      | 0.37  | 0.05 |
| MDA with Cre (uM/g cre) | C20:5 (ug/L)                              | -0.32 | 0.08 |
| MDA with Cre (uM/g cre) | C22:3 (ug/L)                              | -0.33 | 0.08 |



|                           |                                       |       |      |
|---------------------------|---------------------------------------|-------|------|
| MDA with Cre (uM/g cre)   | C22:4/cre (ug/g cre)                  | 0.40  | 0.03 |
| MDA with Cre (uM/g cre)   | C22:5/cre (ug/g cre)                  | 0.45  | 0.01 |
| MDA with Cre (uM/g cre)   | C22:6 (ug/L)                          | -0.38 | 0.04 |
| MDA with Cre (uM/g cre)   | C22:6/cre (ug/g cre)                  | 0.46  | 0.01 |
| MDA with Cre (uM/g cre)   | C24:0/cre (ug/g cre)                  | 0.31  | 0.09 |
| MDA with Cre (uM/g cre)   | C24:1 (ug/L)                          | -0.38 | 0.04 |
| MDA with Cre (uM/g cre)   | MeIQx with Cre (ng/g cre)             | 0.61  | 0.00 |
| MDA with Cre (uM/g cre)   | MUFA                                  | -0.31 | 0.09 |
| MDA with Cre (uM/g cre)   | PhIP (ng/L)                           | 0.39  | 0.03 |
| MDA with Cre (uM/g cre)   | PhIP with Cre (ng/g cre)              | 0.62  | 0.00 |
| MDA with Cre (uM/g cre)   | PUFA                                  | -0.39 | 0.04 |
| MDA with Cre (uM/g cre)   | UFA (ug/L)                            | -0.33 | 0.07 |
| MDA with Cre (uM/g cre)   | XPC                                   | 0.52  | 0.01 |
| MeIQx (ng/L)              | APC                                   | 0.62  | 0.00 |
| MeIQx (ng/L)              | C18:1 Mix (ug/L)                      | 0.31  | 0.09 |
| MeIQx (ng/L)              | C18:2 Mix (ug/L)                      | 0.42  | 0.02 |
| MeIQx (ng/L)              | C18:3 Alpha Linolenate (ug/L)         | 0.37  | 0.04 |
| MeIQx (ng/L)              | C18:3 Gamma Linolenate (ug/L)         | 0.43  | 0.02 |
| MeIQx (ng/L)              | C20:4 (ug/L)                          | 0.43  | 0.02 |
| MeIQx (ng/L)              | C22:6 (ug/L)                          | 0.43  | 0.02 |
| MeIQx (ng/L)              | CCL2                                  | 0.75  | 0.02 |
| MeIQx (ng/L)              | KRAS                                  | 0.62  | 0.00 |
| MeIQx (ng/L)              | MGMT                                  | -0.41 | 0.05 |
| MeIQx (ng/L)              | PTGS2                                 | 0.48  | 0.02 |
| MeIQx (ng/L)              | PUFA                                  | 0.44  | 0.02 |
| MeIQx (ng/L)              | SULT1A1                               | 0.53  | 0.01 |
| MeIQx (ng/L)              | UFA (ug/L)                            | 0.34  | 0.07 |
| MeIQx with Cre (ng/g cre) | C15:0/cre (ug/g cre)                  | 0.33  | 0.07 |
| MeIQx with Cre (ng/g cre) | C15:1 (ug/L)                          | -0.44 | 0.01 |
| MeIQx with Cre (ng/g cre) | C18:0/cre (ug/g cre)                  | 0.39  | 0.03 |
| MeIQx with Cre (ng/g cre) | C18:3 Alpha Linolenate/cre (ug/g cre) | 0.37  | 0.04 |
| MeIQx with Cre (ng/g cre) | C20:4 (ug/L)                          | -0.39 | 0.03 |
| MeIQx with Cre (ng/g cre) | C20:4/cre (ug/g cre)                  | 0.54  | 0.00 |
| MeIQx with Cre (ng/g cre) | C22:0/cre (ug/g cre)                  | 0.51  | 0.00 |
| MeIQx with Cre (ng/g cre) | C22:1/cre (ug/g cre)                  | 0.65  | 0.00 |
| MeIQx with Cre (ng/g cre) | C22:4 (ug/L)                          | -0.36 | 0.05 |
| MeIQx with Cre (ng/g cre) | C22:4/cre (ug/g cre)                  | 0.57  | 0.00 |
| MeIQx with Cre (ng/g cre) | C22:5 (ug/L)                          | -0.35 | 0.05 |
| MeIQx with Cre (ng/g cre) | C22:5/cre (ug/g cre)                  | 0.58  | 0.00 |
| MeIQx with Cre (ng/g cre) | C22:6 (ug/L)                          | -0.38 | 0.04 |

|                           |                                       |       |      |
|---------------------------|---------------------------------------|-------|------|
| MeIQx with Cre (ng/g cre) | C22:6/cre (ug/g cre)                  | 0.74  | 0.00 |
| MeIQx with Cre (ng/g cre) | C24:0/cre (ug/g cre)                  | 0.46  | 0.01 |
| MeIQx with Cre (ng/g cre) | C24:1 (ug/L)                          | -0.33 | 0.07 |
| MeIQx with Cre (ng/g cre) | C24:1/cre (ug/g cre)                  | 0.61  | 0.00 |
| MeIQx with Cre (ng/g cre) | PhIP with Cre (ng/g cre)              | 0.88  | 0.00 |
| MeIQx with Cre (ng/g cre) | SAFA/cre                              | 0.32  | 0.08 |
| MGMT                      | C22:0 (ug/L)                          | 0.46  | 0.03 |
| MGMT                      | C24:0 (ug/L)                          | 0.46  | 0.03 |
| MGMT                      | SULT1A1                               | -0.40 | 0.06 |
| MLH1                      | C22:1/cre (ug/g cre)                  | -0.35 | 0.10 |
| MLH1                      | XPC                                   | 0.45  | 0.04 |
| MUFA                      | MUFA/cre (ug/g cre)                   | 0.78  | 0.00 |
| MUFA                      | PUFA                                  | 0.88  | 0.00 |
| MUFA                      | PUFA/cre (ug/g cre)                   | 0.59  | 0.00 |
| MUFA                      | UFA (ug/L)                            | 1.00  | 0.00 |
| MUFA                      | UFA/cre (ug/g cre)                    | 0.75  | 0.00 |
| MUFA/cre                  | PUFA                                  | 0.58  | 0.00 |
| MUFA/cre                  | PUFA/cre (ug/g cre)                   | 0.90  | 0.00 |
| MUFA/cre                  | UFA (ug/L)                            | 0.75  | 0.00 |
| MUFA/cre                  | UFA/cre (ug/g cre)                    | 1.00  | 0.00 |
| NAT2                      | C20:4 (ug/L)                          | 0.48  | 0.07 |
| NAT2                      | C22:4 (ug/L)                          | 0.56  | 0.03 |
| NAT2                      | C22:5 (ug/L)                          | 0.76  | 0.00 |
| NAT2                      | C22:6 (ug/L)                          | 0.65  | 0.01 |
| PhIP (ng/L)               | APC                                   | 0.52  | 0.01 |
| PhIP (ng/L)               | C20:4/cre (ug/g cre)                  | 0.36  | 0.05 |
| PhIP (ng/L)               | C22:6/cre (ug/g cre)                  | 0.31  | 0.09 |
| PhIP (ng/L)               | KRAS                                  | 0.55  | 0.01 |
| PhIP (ng/L)               | MeIQx with Cre (ng/g cre)             | 0.43  | 0.02 |
| PhIP (ng/L)               | PhIP with Cre (ng/g cre)              | 0.67  | 0.00 |
| PhIP (ng/L)               | PTGS2                                 | 0.51  | 0.01 |
| PhIP (ng/L)               | SULT1A1                               | 0.66  | 0.00 |
| PhIP (ng/L)               | XPC                                   | 0.44  | 0.04 |
| PhIP with Cre (ng/g cre)  | C15:0/cre (ug/g cre)                  | 0.34  | 0.07 |
| PhIP with Cre (ng/g cre)  | C15:1 (ug/L)                          | -0.38 | 0.04 |
| PhIP with Cre (ng/g cre)  | C18:0/cre (ug/g cre)                  | 0.43  | 0.02 |
| PhIP with Cre (ng/g cre)  | C18:3 Alpha Linolenate/cre (ug/g cre) | 0.39  | 0.04 |
| PhIP with Cre (ng/g cre)  | C19:1 (ug/L)                          | -0.31 | 0.10 |
| PhIP with Cre (ng/g cre)  | C20:4 (ug/L)                          | -0.36 | 0.05 |
| PhIP with Cre (ng/g cre)  | C20:4/cre (ug/g cre)                  | 0.58  | 0.00 |

|                          |                                       |       |      |
|--------------------------|---------------------------------------|-------|------|
| PhIP with Cre (ng/g cre) | C22:0/cre (ug/g cre)                  | 0.51  | 0.00 |
| PhIP with Cre (ng/g cre) | C22:1/cre (ug/g cre)                  | 0.45  | 0.01 |
| PhIP with Cre (ng/g cre) | C22:4 (ug/L)                          | -0.32 | 0.09 |
| PhIP with Cre (ng/g cre) | C22:4/cre (ug/g cre)                  | 0.57  | 0.00 |
| PhIP with Cre (ng/g cre) | C22:5 (ug/L)                          | -0.33 | 0.08 |
| PhIP with Cre (ng/g cre) | C22:5/cre (ug/g cre)                  | 0.63  | 0.00 |
| PhIP with Cre (ng/g cre) | C22:6 (ug/L)                          | -0.37 | 0.05 |
| PhIP with Cre (ng/g cre) | C22:6/cre (ug/g cre)                  | 0.75  | 0.00 |
| PhIP with Cre (ng/g cre) | C24:0/cre (ug/g cre)                  | 0.44  | 0.02 |
| PhIP with Cre (ng/g cre) | C24:1 (ug/L)                          | -0.31 | 0.09 |
| PhIP with Cre (ng/g cre) | C24:1/cre (ug/g cre)                  | 0.60  | 0.00 |
| PhIP with Cre (ng/g cre) | SAFA/cre                              | 0.34  | 0.06 |
| PhIP with Cre (ng/g cre) | total fatty acid/cre                  | 0.32  | 0.08 |
| PPARG                    | C14:1/cre (ug/g cre)                  | -0.41 | 0.07 |
| PPARG                    | C18:3 Gamma Linolenate/cre (ug/g cre) | -0.38 | 0.10 |
| PPARG                    | C20:5/cre (ug/g cre)                  | -0.42 | 0.07 |
| PPARG                    | C22:6 (ug/L)                          | 0.39  | 0.09 |
| PPARG                    | C24:1 (ug/L)                          | 0.40  | 0.08 |
| Processed meat (g)       | Animal lipid (g/day)                  | 0.61  | 0.00 |
| Processed meat (g)       | Total lipid (g)                       | 0.48  | 0.01 |
| PTGS2                    | APC                                   | 0.61  | 0.00 |
| PTGS2                    | C18:3 Gamma Linolenate (ug/L)         | 0.36  | 0.09 |
| PTGS2                    | C22:6 (ug/L)                          | 0.37  | 0.08 |
| PTGS2                    | KRAS                                  | 0.68  | 0.00 |
| PTGS2                    | SULT1A1                               | 0.80  | 0.00 |
| PTGS2                    | XPC                                   | 0.66  | 0.00 |
| PUFA                     | PUFA/cre (ug/g cre)                   | 0.54  | 0.00 |
| PUFA                     | UFA (ug/L)                            | 0.92  | 0.00 |
| PUFA                     | UFA/cre (ug/g cre)                    | 0.58  | 0.00 |
| PUFA/cre                 | UFA (ug/L)                            | 0.59  | 0.00 |
| PUFA/cre                 | UFA/cre (ug/g cre)                    | 0.93  | 0.00 |
| Red meat (g)             | C18:3 Alpha Linolenate/cre (ug/g cre) | 0.36  | 0.06 |
| Red meat (g)             | C20:4/cre (ug/g cre)                  | 0.40  | 0.03 |
| Red meat (g)             | C22:6/cre (ug/g cre)                  | 0.40  | 0.03 |
| Red meat (g)             | MDA with Cre (uM/g cre)               | 0.43  | 0.02 |
| Red meat (g)             | MeIQx with Cre (ng/g cre)             | 0.33  | 0.08 |
| Red meat (g)             | PhIP with Cre (ng/g cre)              | 0.34  | 0.07 |
| Red meat (g)             | PPARG                                 | 0.43  | 0.06 |
| Red meat (g)             | Processed meat (g)                    | 0.33  | 0.08 |
| Red meat (g)             | SULT1A1                               | 0.37  | 0.09 |

|                      |                            |       |      |
|----------------------|----------------------------|-------|------|
| Red meat (g)         | TP53                       | -0.48 | 0.03 |
| Red meat (g)         | Animal lipid (g/day)       | 0.77  | 0.00 |
| Red meat (g)         | Total lipid (g)            | 0.55  | 0.00 |
| SAFA                 | MUFA                       | 0.82  | 0.00 |
| SAFA                 | MUFA/cre (ug/g cre)        | 0.67  | 0.00 |
| SAFA                 | PUFA                       | 0.57  | 0.00 |
| SAFA                 | PUFA/cre (ug/g cre)        | 0.43  | 0.02 |
| SAFA                 | SAFA/cre                   | 0.70  | 0.00 |
| SAFA                 | UFA (ug/L)                 | 0.78  | 0.00 |
| SAFA                 | UFA/cre (ug/g cre)         | 0.64  | 0.00 |
| SAFA/cre             | MUFA                       | 0.56  | 0.00 |
| SAFA/cre             | MUFA/cre (ug/g cre)        | 0.83  | 0.00 |
| SAFA/cre             | PUFA/cre (ug/g cre)        | 0.71  | 0.00 |
| SAFA/cre             | UFA (ug/L)                 | 0.52  | 0.00 |
| SAFA/cre             | UFA/cre (ug/g cre)         | 0.82  | 0.00 |
| TC (mg/dL)           | C19:1 (ug/L)               | 0.32  | 0.09 |
| TC (mg/dL)           | C22:4 (ug/L)               | -0.37 | 0.05 |
| TC (mg/dL)           | C22:5 (ug/L)               | -0.33 | 0.08 |
| TC (mg/dL)           | dG-C8 MeIQx/1.766ug of DNA | 0.31  | 0.09 |
| TC (mg/dL)           | Fruit (g)                  | -0.35 | 0.06 |
| TC (mg/dL)           | LDLC (mg/dL)               | 0.77  | 0.00 |
| TC (mg/dL)           | MDA (umol/L)               | -0.31 | 0.10 |
| TC (mg/dL)           | MLH1                       | 0.37  | 0.08 |
| TC (mg/dL)           | NAT2                       | -0.66 | 0.01 |
| TC (mg/dL)           | TG (mg/dL)                 | 0.46  | 0.01 |
| TG (mg/dL)           | Processed meat (g)         | 0.32  | 0.09 |
| TG (mg/dL)           | PTGS2                      | -0.40 | 0.06 |
| TG (mg/dL)           | UGT1A9                     | 0.46  | 0.10 |
| TG (mg/dL)           | Animal lipid (g/day)       | 0.51  | 0.00 |
| TG (mg/dL)           | Vegetable lipid (g)        | 0.51  | 0.00 |
| TG (mg/dL)           | Total lipid (g)            | 0.61  | 0.00 |
| total fatty acid     | MUFA                       | 0.90  | 0.00 |
| total fatty acid     | MUFA/cre (ug/g cre)        | 0.72  | 0.00 |
| total fatty acid     | PUFA                       | 0.68  | 0.00 |
| total fatty acid     | PUFA/cre (ug/g cre)        | 0.49  | 0.01 |
| total fatty acid     | SAFA                       | 0.99  | 0.00 |
| total fatty acid     | SAFA/cre                   | 0.68  | 0.00 |
| total fatty acid     | total fatty acid/cre       | 0.71  | 0.00 |
| total fatty acid     | UFA (ug/L)                 | 0.87  | 0.00 |
| total fatty acid     | UFA/cre (ug/g cre)         | 0.69  | 0.00 |
| total fatty acid/cre | MUFA                       | 0.63  | 0.00 |

|                      |                                       |       |      |
|----------------------|---------------------------------------|-------|------|
| total fatty acid/cre | MUFA/cre (ug/g cre)                   | 0.90  | 0.00 |
| total fatty acid/cre | PUFA                                  | 0.36  | 0.05 |
| total fatty acid/cre | PUFA/cre (ug/g cre)                   | 0.79  | 0.00 |
| total fatty acid/cre | SAFA                                  | 0.71  | 0.00 |
| total fatty acid/cre | SAFA/cre                              | 0.99  | 0.00 |
| total fatty acid/cre | UFA (ug/L)                            | 0.59  | 0.00 |
| total fatty acid/cre | UFA/cre (ug/g cre)                    | 0.89  | 0.00 |
| TP53                 | C14:0/cre (ug/g cre)                  | -0.37 | 0.09 |
| TP53                 | C15:0/cre (ug/g cre)                  | -0.36 | 0.10 |
| TP53                 | C20:4/cre (ug/g cre)                  | -0.48 | 0.02 |
| TP53                 | C22:0/cre (ug/g cre)                  | -0.40 | 0.07 |
| TP53                 | C22:4/cre (ug/g cre)                  | -0.56 | 0.01 |
| TP53                 | C22:5/cre (ug/g cre)                  | -0.52 | 0.01 |
| TP53                 | C22:6/cre (ug/g cre)                  | -0.55 | 0.01 |
| TP53                 | C24:1/cre (ug/g cre)                  | -0.52 | 0.01 |
| TP53                 | total fatty acid/cre                  | -0.36 | 0.10 |
| TP53                 | UGT1A9                                | 0.73  | 0.00 |
| UGT1A9               | C15:1 (ug/L)                          | 0.69  | 0.01 |
| XPC                  | SULT1A1                               | 0.42  | 0.05 |
| Yogurt (g)           | C14:1 (ug/L)                          | 0.36  | 0.06 |
| Yogurt (g)           | C14:1/cre (ug/g cre)                  | 0.52  | 0.00 |
| Yogurt (g)           | C15:0/cre (ug/g cre)                  | 0.32  | 0.09 |
| Yogurt (g)           | C16:0/cre (ug/g cre)                  | 0.35  | 0.06 |
| Yogurt (g)           | C16:1 (ug/L)                          | 0.35  | 0.07 |
| Yogurt (g)           | C16:1/cre (ug/g cre)                  | 0.43  | 0.02 |
| Yogurt (g)           | C16:1T (ug/L)                         | 0.35  | 0.07 |
| Yogurt (g)           | C16:1T/cre (ug/g cre)                 | 0.43  | 0.02 |
| Yogurt (g)           | C18:2 Mix/cre (ug/g cre)              | 0.38  | 0.04 |
| Yogurt (g)           | C18:3 Gamma Linolenate/cre (ug/g cre) | 0.34  | 0.07 |
| Yogurt (g)           | C20:1 Mix (ug/L)                      | 0.64  | 0.00 |
| Yogurt (g)           | C20:1 Mix/cre (ug/g cre)              | 0.64  | 0.00 |
| Yogurt (g)           | C20:2 (ug/L)                          | 0.68  | 0.00 |
| Yogurt (g)           | C20:2/cre (ug/g cre)                  | 0.56  | 0.00 |
| Yogurt (g)           | C20:3 Eicosatrienoate (ug/L)          | 0.80  | 0.00 |
| Yogurt (g)           | C20:3 Eicosatrienoate/cre (ug/g cre)  | 0.81  | 0.00 |
| Yogurt (g)           | C20:4/cre (ug/g cre)                  | -0.36 | 0.06 |
| Yogurt (g)           | C22:1 (ug/L)                          | 0.66  | 0.00 |
| Yogurt (g)           | C22:2 (ug/L)                          | 0.40  | 0.03 |
| Yogurt (g)           | C22:2/cre (ug/g cre)                  | 0.37  | 0.05 |
| Yogurt (g)           | C22:3 (ug/L)                          | 0.44  | 0.02 |

|                      |                            |      |      |
|----------------------|----------------------------|------|------|
| Yogurt (g)           | C22:3/cre (ug/g cre)       | 0.52 | 0.00 |
| Yogurt (g)           | PUFA/cre (ug/g cre)        | 0.36 | 0.06 |
| Animal lipid (g/day) | SULT1A1                    | 0.37 | 0.09 |
| Animal lipid (g/day) | Total lipid (g/day)        | 0.85 | 0.00 |
| Vegetable lipid (g)  | C15:1 (ug/L)               | 0.33 | 0.08 |
| Vegetable lipid (g)  | C24:1 (ug/L)               | 0.33 | 0.08 |
| Vegetable lipid (g)  | dG-C8 MeIQx/1.766ug of DNA | 0.36 | 0.06 |
| Vegetable lipid (g)  | UGT1A9                     | 0.69 | 0.01 |
| Vegetable lipid (g)  | Animal lipid (g/day)       | 0.41 | 0.03 |
| Vegetable lipid (g)  | Total lipid (g)            | 0.83 | 0.00 |
| Total lipid (g)      | UGT1A9                     | 0.61 | 0.02 |

---

Table S3. MRM channels for 8 compounds including internal standards of HCAs and dG-HCAs

| Compounds                   | Precursor ion(m/z) | Product ions(m/z) | Collision energy(eV) | Dwell time(msec) |
|-----------------------------|--------------------|-------------------|----------------------|------------------|
| MeIQx                       | 214.1              | 199               | 30                   | 20               |
|                             |                    | 131               | 45                   | 20               |
| MeIQx-d <sub>3</sub>        | 217.1              | 199               | 34                   | 20               |
|                             |                    | 131               | 42                   | 20               |
| dG-C8 MeIQx                 | 479.1              | 363.1             | 17                   | 20               |
|                             |                    | 299.1             | 64                   | 20               |
| dG-C8 MeIQx -d <sub>3</sub> | 482.1              | 366.1             | 17                   | 20               |
| PhIP                        | 225.1              | 210               | 34                   | 20               |
|                             |                    | 140               | 45                   | 20               |
| PhIP-d <sub>3</sub>         | 228.1              | 210               | 34                   | 20               |
|                             |                    | 140               | 45                   | 20               |
| dG-C8 PhIP                  | 490.1              | 374.1             | 20                   | 20               |
|                             |                    | 250.1             | 60                   | 20               |
| dG-C8 PhIP -d <sub>3</sub>  | 493.1              | 377.1             | 25                   | 20               |

Table S4. Rank of association between tobacco or fish intake and exposure biomarkers

|              |                    |                                                     |
|--------------|--------------------|-----------------------------------------------------|
| Note         |                    |                                                     |
| DIETHABIT_06 | Frequency of fish  | 1=rarely<br>2=one piece/2 days<br>3= ≥one piece/day |
| ppd          | cigarette pack/day |                                                     |

| Variable                   | by Variable                | Correlation | Signif Prob |
|----------------------------|----------------------------|-------------|-------------|
| PhIP with Cre (ng/g cre)   | MeIQx with Cre (ng/g cre)  | 0.8806      | 0           |
| PhIP with Cre (ng/g cre)   | PhIP (ng/L)                | 0.669       | 0.0001      |
| MeIQx with Cre (ng/g cre)  | 1-OHP with Cre (ug/g Cre)  | 0.6149      | 0.0003      |
| PhIP with Cre (ng/g cre)   | 1-OHP with Cre (ug/g Cre)  | 0.5175      | 0.0034      |
| MeIQx with Cre (ng/g cre)  | dG-C8 MeIQx/1.766ug of DNA | -0.4278     | 0.0184      |
| MeIQx with Cre (ng/g cre)  | PhIP (ng/L)                | 0.4266      | 0.0187      |
| MeIQx with Cre (ng/g cre)  | 1-OHP (ug/L)               | -0.4183     | 0.0214      |
| PhIP with Cre (ng/g cre)   | 1-OHP (ug/L)               | -0.3462     | 0.061       |
| 1-OHP (ug/L)               | dG-C8 MeIQx/1.766ug of DNA | 0.3116      | 0.0937      |
| MeIQx with Cre (ng/g cre)  | MeIQx (ng/L)               | 0.2653      | 0.1566      |
| PhIP (ng/L)                | 1-OHP with Cre (ug/g Cre)  | 0.2553      | 0.1734      |
| 1-OHP (ug/L)               | DIETHABIT_06               | -0.2353     | 0.2192      |
| PhIP (ng/L)                | dG-C8 MeIQx/1.766ug of DNA | -0.2301     | 0.2212      |
| 1-OHP with Cre (ug/g Cre)  | ppd                        | 0.2137      | 0.2569      |
| 1-OHP with Cre (ug/g Cre)  | dG-C8 MeIQx/1.766ug of DNA | -0.19       | 0.3146      |
| PhIP with Cre (ng/g cre)   | DIETHABIT_06               | 0.1777      | 0.3564      |
| MeIQx (ng/L)               | 1-OHP with Cre (ug/g Cre)  | -0.1731     | 0.3602      |
| MeIQx with Cre (ng/g cre)  | DIETHABIT_06               | 0.1507      | 0.4352      |
| dG-C8 MeIQx/1.766ug of DNA | ppd                        | 0.1454      | 0.4432      |
| C18:3 Alpha Linolenate     | PhIP (ng/L)                | 0.142       | 0.454       |
| MeIQx (ng/L)               | DIETHABIT_06               | -0.1301     | 0.5012      |
| PhIP (ng/L)                | ppd                        | -0.1155     | 0.5435      |
| 1-OHP (ug/L)               | ppd                        | 0.0935      | 0.6231      |
| MeIQx (ng/L)               | dG-C8 MeIQx/1.766ug of DNA | -0.0839     | 0.6593      |
| PhIP (ng/L)                | MeIQx (ng/L)               | 0.0805      | 0.6725      |
| C18:3 Alpha Linolenate     | 1-OHP (ug/L)               | -0.079      | 0.6781      |
| PhIP (ng/L)                | 1-OHP (ug/L)               | -0.0755     | 0.6915      |
| C18:3 Alpha Linolenate     | 1-OHP with Cre (ug/g Cre)  | -0.0573     | 0.7635      |
| C18:3 Alpha Linolenate     | DIETHABIT_06               | 0.0561      | 0.7727      |
| ppd                        | DIETHABIT_06               | -0.0513     | 0.7916      |
| C18:3 Alpha Linolenate     | ppd                        | -0.0412     | 0.8289      |
| MeIQx with Cre (ng/g cre)  | ppd                        | -0.0352     | 0.8534      |
| PhIP with Cre (ng/g cre)   | MeIQx (ng/L)               | 0.0307      | 0.8722      |
| C18:3 Alpha Linolenate     | dG-C8 MeIQx/1.766ug of DNA | 0.0277      | 0.8843      |
| PhIP with Cre (ng/g cre)   | ppd                        | -0.0236     | 0.9015      |
| 1-OHP with Cre (ug/g Cre)  | DIETHABIT_06               | 0.0238      | 0.9024      |



|                            |              |         |        |
|----------------------------|--------------|---------|--------|
| dG-C8 MeIQx/1.766ug of DNA | DIETHABIT_06 | -0.0238 | 0.9025 |
| MeIQx (ng/L)               | ppd          | -0.0223 | 0.9067 |
| 1-OHP with Cre (ug/g Cre)  | 1-OHP (ug/L) | -0.0218 | 0.9091 |
| MeIQx (ng/L)               | 1-OHP (ug/L) | 0.0089  | 0.9626 |
| PhIP (ng/L)                | DIETHABIT_06 | -0.0006 | 0.9974 |

Table. S5. Sequences of the sense and antisense primers used for quantitative real time PCR

| Gene           | Sense primer              | Antisense primer          |
|----------------|---------------------------|---------------------------|
| <i>CCL2</i>    | AGAAGAATCACCAGCAGCAAG     | GTCTTCGGAGTTTGGGTTTG      |
| <i>PTGS2</i>   | GCCATACAGCAAATCCTTGC      | TCCATAGAATCCTGTCCGGG      |
| <i>APC</i>     | TGCCAGTAAATAAAAGTGCTATGAC | AAATTGAAGTGTTTACAAAGTGGTG |
| <i>KRAS</i>    | CTGTGTCCCCACGGTCATC       | GCTCTTGATTTGTCAGCAGGA     |
| <i>MLH1</i>    | TCAGGTTATCGGAGCCAGC       | GCAAGCATCTCAGCCTTCTT      |
| <i>TP53</i>    | TGCTCAGATAGCGATGGTCT      | CACCACCACACTATGTGCGAA     |
| <i>XPC</i>     | AGGACACACACAAGGTTAC       | CAGCACTCTGGTAAAGCGG       |
| <i>LEP</i>     | AACCCTGTGCGGATTCTTG       | GACTGCGTGTGTGAAATGTC      |
| <i>PPARG</i>   | TCAGAAATGCCTTGCACTGG      | GATCTCCGCCAACAGCTTC       |
| <i>APOA1</i>   | GCCCTACCTGGACGACTTC       | CTCAGCTTCTCTTGCAGCTC      |
| <i>MGMT</i>    | TTTCCAGCAAGAGTCGTTCA      | ATGAGGATGGGGACAGGATT      |
| <i>CYP1A2</i>  | TCCCTGAGAGTAGCGATGAG      | TAGGCAGGTAGCGAAGGATG      |
| <i>SULT1A1</i> | CGTGGACTTCGTGGTTCAG       | GTGAAGGTGGTCTTCCAGTC      |
| <i>NAT2</i>    | TACTGTTTGGTGGGCTTCATC     | TCTTCAACCTCTTCCTCAGTG     |
| <i>UGT1A9</i>  | TGGAAAGCACAAGTACGAAG      | GGATCGAGAAACACTGCATC      |
| <i>RPLP0</i>   | ACTGCTGCCTCATATCCGGG      | GCAGCTGGCACCTTATTGGC      |
